# Supplementary material for: Factors Associated with Frailty in Older Adults in Community and Nursing Home Settings: A Systematic Review with a Meta-Analysis
Source: MDPI journal article supplement (doi:10.3390/jcm13082382), 2024-04-19
Supplement: s1 [file s1]

| No | Databases      | Search tremms                                                                                                                                                                                                                                                                                                                                                                                                                                                                                                                                                                                                                                            |
|----|----------------|----------------------------------------------------------------------------------------------------------------------------------------------------------------------------------------------------------------------------------------------------------------------------------------------------------------------------------------------------------------------------------------------------------------------------------------------------------------------------------------------------------------------------------------------------------------------------------------------------------------------------------------------------------|
| 1  | PubMed         | #1.Search aged[MeSH Terms]<br>#2.Search (aged [Title/Abstract] OR older People [Title/Abstract] OR elderly [Title/Abstract] OR older adults [Title/Abstract])<br>#3.Search(#1 OR #2)<br>#4.Search frailty[MeSH Terms]<br>#5.Search (frailty [Title/Abstract] OR frail [Title/Abstract] OR debilit* [Title/Abstract])<br>#6.Search( #4 OR #5)<br>#7.Search risk factors[MeSH Terms]<br>#8.Search (risk factors [Title/Abstract] OR associated factors [Title/Abstract] OR influence factors [Title/Abstract] OR precipitating factors [Title/Abstract] OR contributing factors [Title/Abstract])<br>#9.Search (#7 OR #8)<br>#10.Search (#3 AND #6 AND #9) |
| 2  | MEDLINE        | #1.Search aged[MH]<br>#2.Search (aged [AB] OR older people [AB] OR elderly [AB] OR older adults [AB])<br>#3.Search(#1 OR #2)<br>#4.Search frailty[MH]<br>#5.Search (frailty [AB] OR frail [AB] OR debilit* [AB])<br>#6.Search( #4 OR #5)<br>#7.Search risk factors[MH]<br>#8.Search (risk factors [AB] OR associated factors [AB] OR influence factors [AB] OR precipitating factors [AB] OR contributing factors [AB])<br>#9.Search (#7 OR #8)<br>#10.Search (#3 AND #6 AND #9)                                                                                                                                                                         |
| 3  | EMBASE         | #1.Search ‘aged’/exp<br>#2.Search (‘aged’:ti.ab.kw OR ‘older people’:ti.ab.kw OR ‘elderly’:ti.ab.kw OR ‘older adults’: ti.ab.kw)<br>#3.Search(#1 OR #2)<br>#4.Search ‘frailty’/exp<br>#5.Search (‘frailty’:ti.ab.kw OR ‘Frail’:ti.ab.kw OR ‘debilit*’:ti.ab.kw)<br>#6.Search( #4 OR #5)<br>#7.Search ‘risk factors’/exp<br>#8.Search (‘risk factors’:ti.ab.kw OR ‘associated factors’:ti.ab.kw OR ‘influence factors’:ti.ab.kw OR ‘precipitating factors’:ti.ab.kw OR ‘contributing factors’:ti.ab.kw)<br>#9.Search (#7 OR #8)<br>#10.Search (#3 AND #6 AND #9)                                                                                          |
| 4  | Web of Science | #1.Search (aged[Topic] OR older people[Topic] OR elderly[Topic] OR older adults[Topic])<br>#2.Search (Frailty [Topic] OR Frail [Topic] OR debilit* [Topic])                                                                                                                                                                                                                                                                                                                                                                                                                                                                                              |

|   |          |                                                                                                                                                                                                                                                                                                                                                                                                                                                                                                                                                                                                                                                                                                                                                                                                     |
|---|----------|-----------------------------------------------------------------------------------------------------------------------------------------------------------------------------------------------------------------------------------------------------------------------------------------------------------------------------------------------------------------------------------------------------------------------------------------------------------------------------------------------------------------------------------------------------------------------------------------------------------------------------------------------------------------------------------------------------------------------------------------------------------------------------------------------------|
|   |          | <p>#3.Search (risk factors[Topic] OR associated factors[Topic] OR influence factors[Topic] OR precipitating factors[Topic] OR contributing factors [Topic])</p> <p>#4.Search (#1AND #2 AND #3)</p>                                                                                                                                                                                                                                                                                                                                                                                                                                                                                                                                                                                                  |
| 5 | Cochrane | <p>#1.Search aged[MeSH terms]</p> <p>#2.Search (aged [Title Abstract Keyword] OR older people [Title Abstract Keyword] OR elderly [Title Abstract Keyword] OR older adults [Title Abstract Keyword])</p> <p>#3.Search(#1 OR #2)</p> <p>#4.Search frailty[MeSH terms]</p> <p>#5.Search (frailty [Title Abstract Keyword] OR frail [Title Abstract Keyword] OR debilit* [Title Abstract Keyword])</p> <p>#6.Search( #4 OR #5)</p> <p>#7.Search risk factors[MeSH terms]</p> <p>#8.Search (risk factors [Title Abstract Keyword] OR associated factors [Title Abstract Keyword] OR influence factors [Title Abstract Keyword] OR precipitating factors [Title Abstract Keyword] OR contributing factors [Title Abstract Keyword])</p> <p>#9.Search (#7 OR #8)</p> <p>#10.Search (#3 AND #6 AND #9)</p> |
