# Supplementary material for: Factors Associated with Frailty in Older Adults in Community and Nursing Home Settings: A Systematic Review with a Meta-Analysis
Source: MDPI journal article supplement (doi:10.3390/jcm13082382), 2024-04-19
Supplement: s1 [file s1]

A

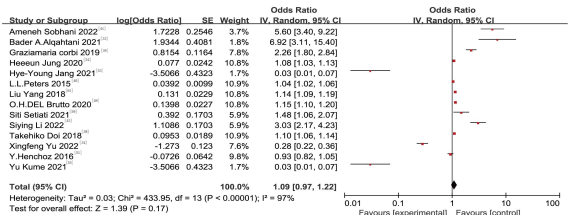

B

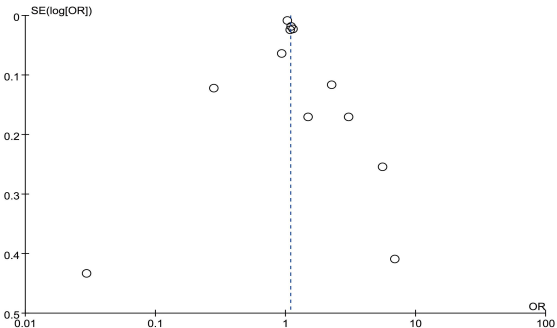

C

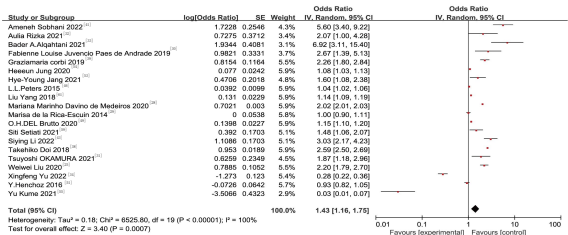

D

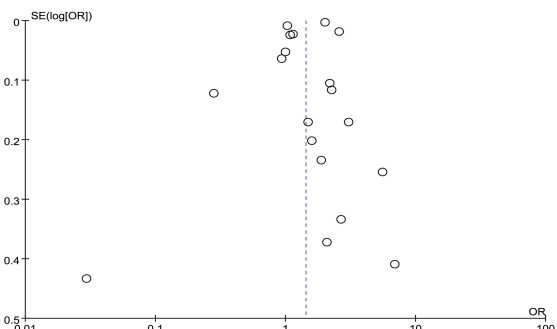

E

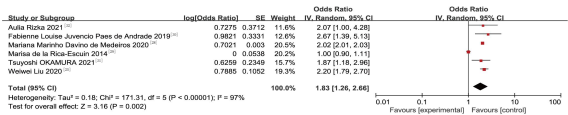

F

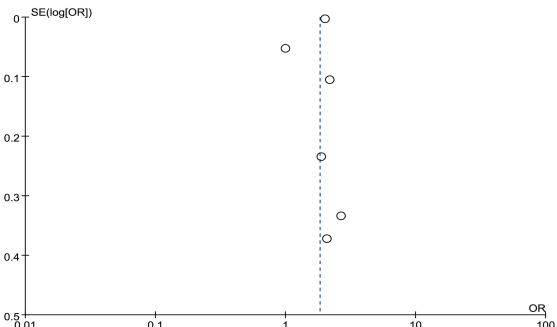

G

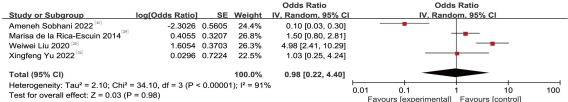

H

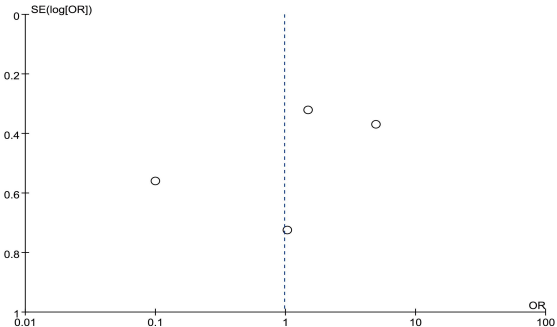

I

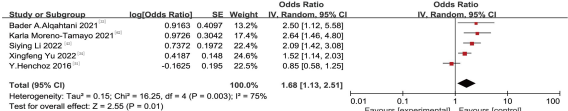

J

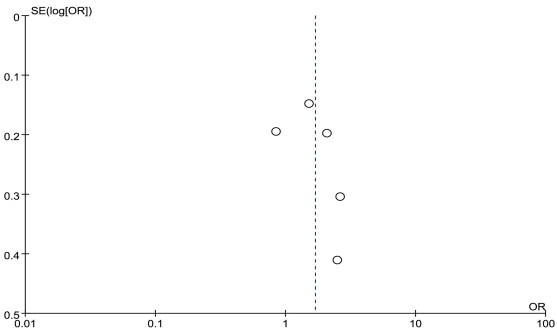

K

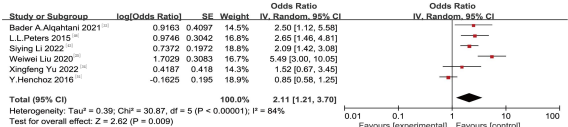

L

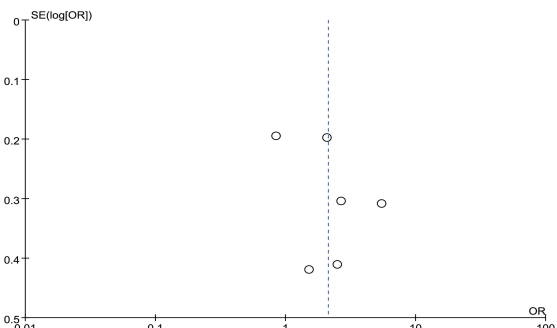

M

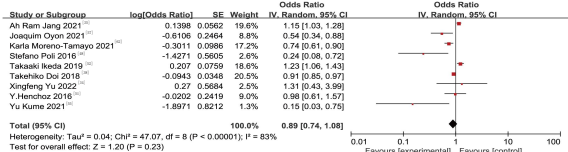

N

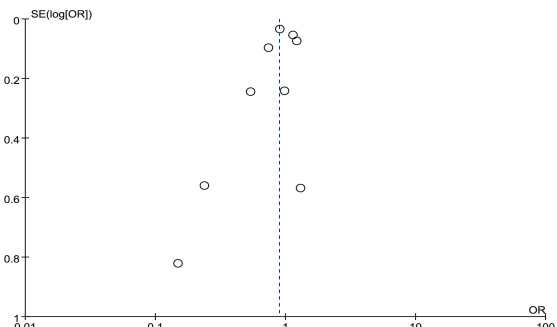

O

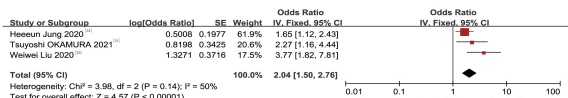

P

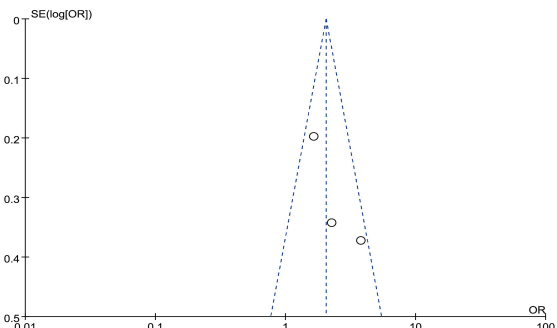

Q

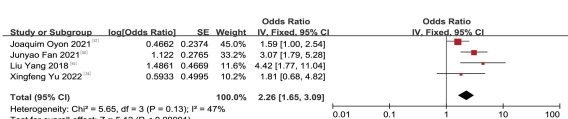

R

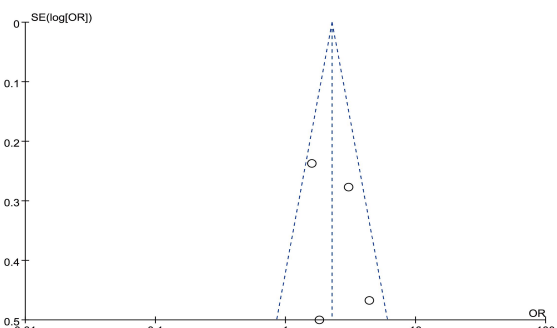

**Supplementary Figure S1.** Meta-analysis of sociodemographic factors of frailty for [A,B] age(community), [C,D] age(community and nursing home), [E,F] age (nursing home), [G,H] female (community and nursing home), [I,J] living alone (community), [K,L] living alone (community and nursing home), [M,N] low education (community), [O,P] poor self-reported health (community and nursing home), and [Q,R] Unmarried/divorced/widowed (community). Forest plots are represented by mean with 95% confidence interval.

A

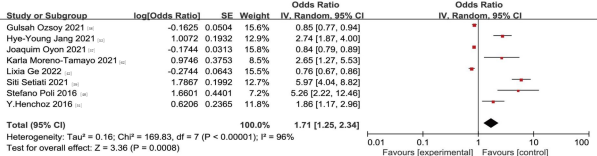

B

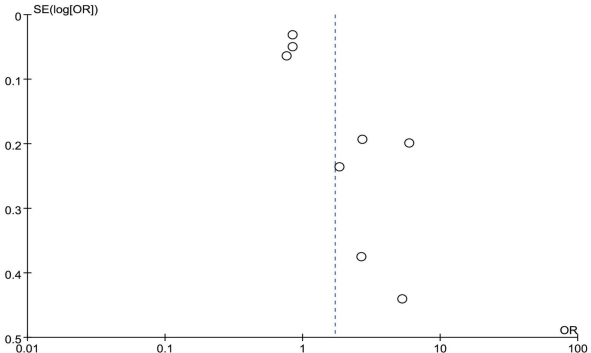

C

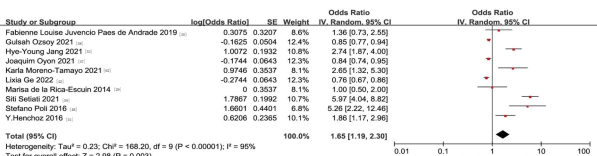

D

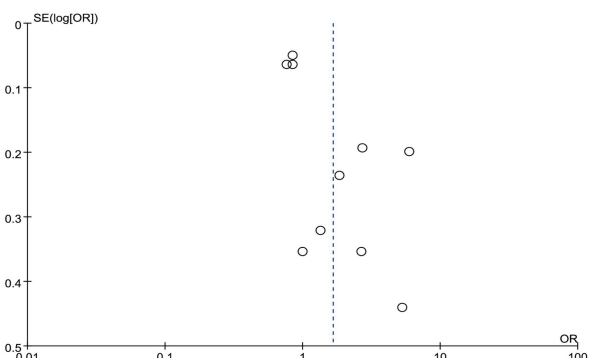

E

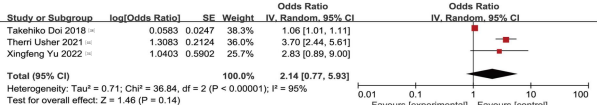

F

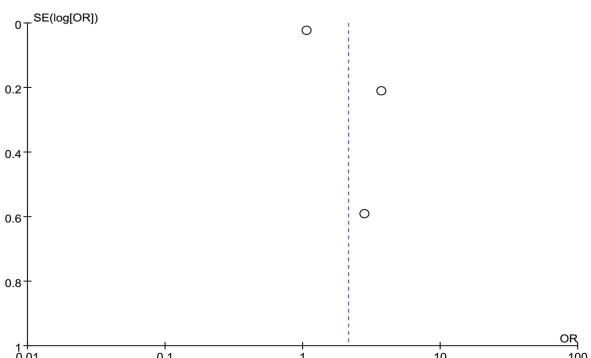

G

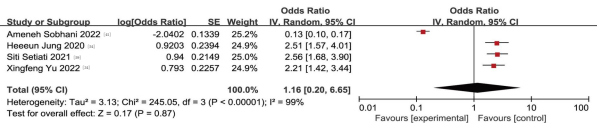

H

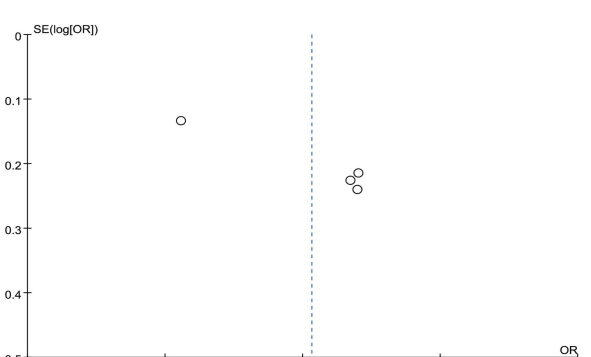

I

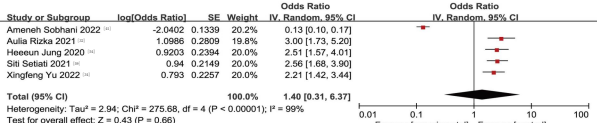

J

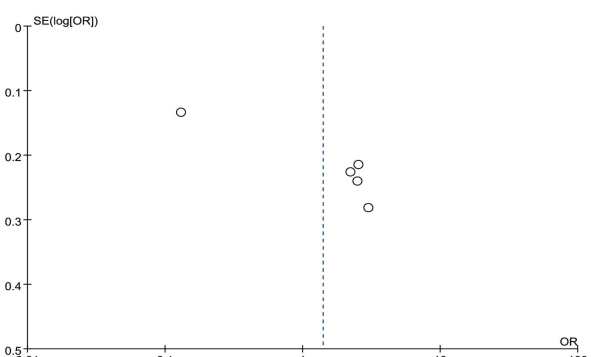

K

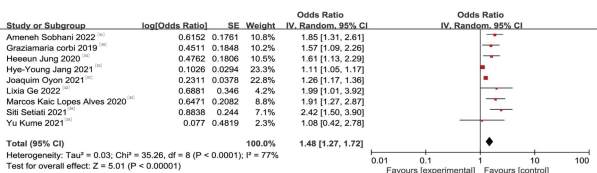

L

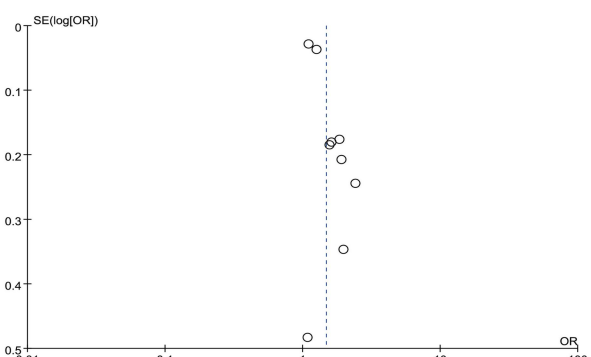

M

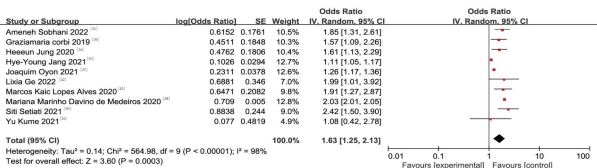

N

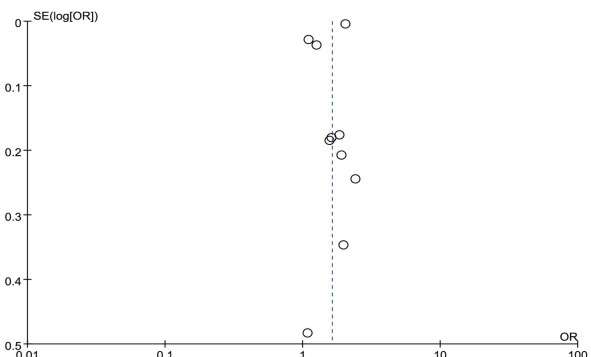

O

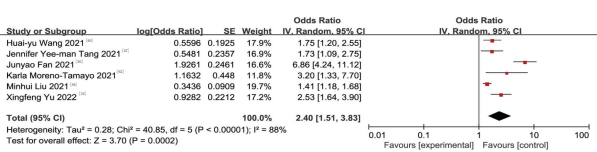

P

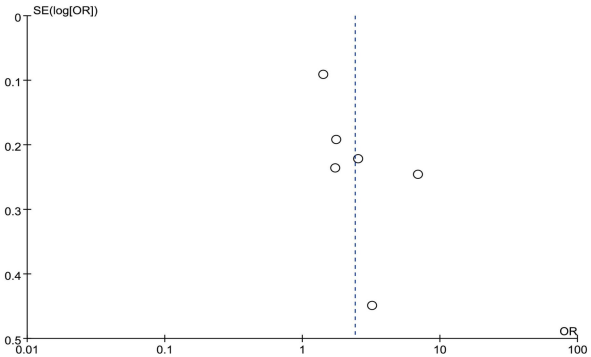

Q

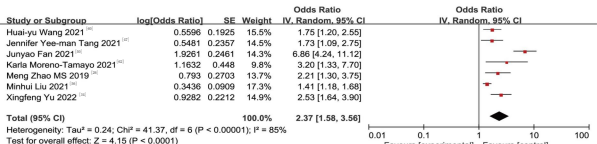

R

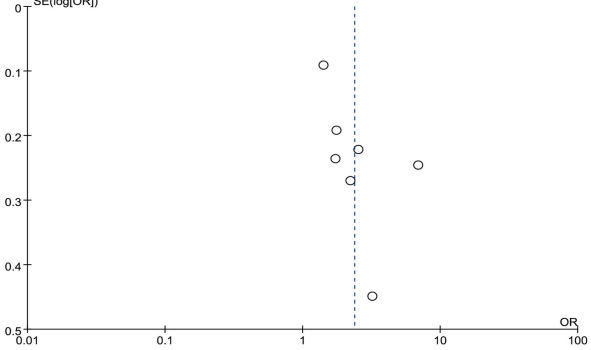

**Supplementary Figure S2.** Meta-analysis of physiological factors of frailty for [A,B] low ADL (community), [C,D] low ADL(community and nursing home), [E,F] low BMI (community), [G,H] malnutrition (community), [I,J] malnutrition (community and nursing home), [K,L] poly pharmacy (community), [M,N] poly pharmacy (community and nursin ghome), [O,P] poor sleep (community), and [Q,R] poor sleep (community and nursing home). Forest plot is represent edby mean with 95% confidence interval.

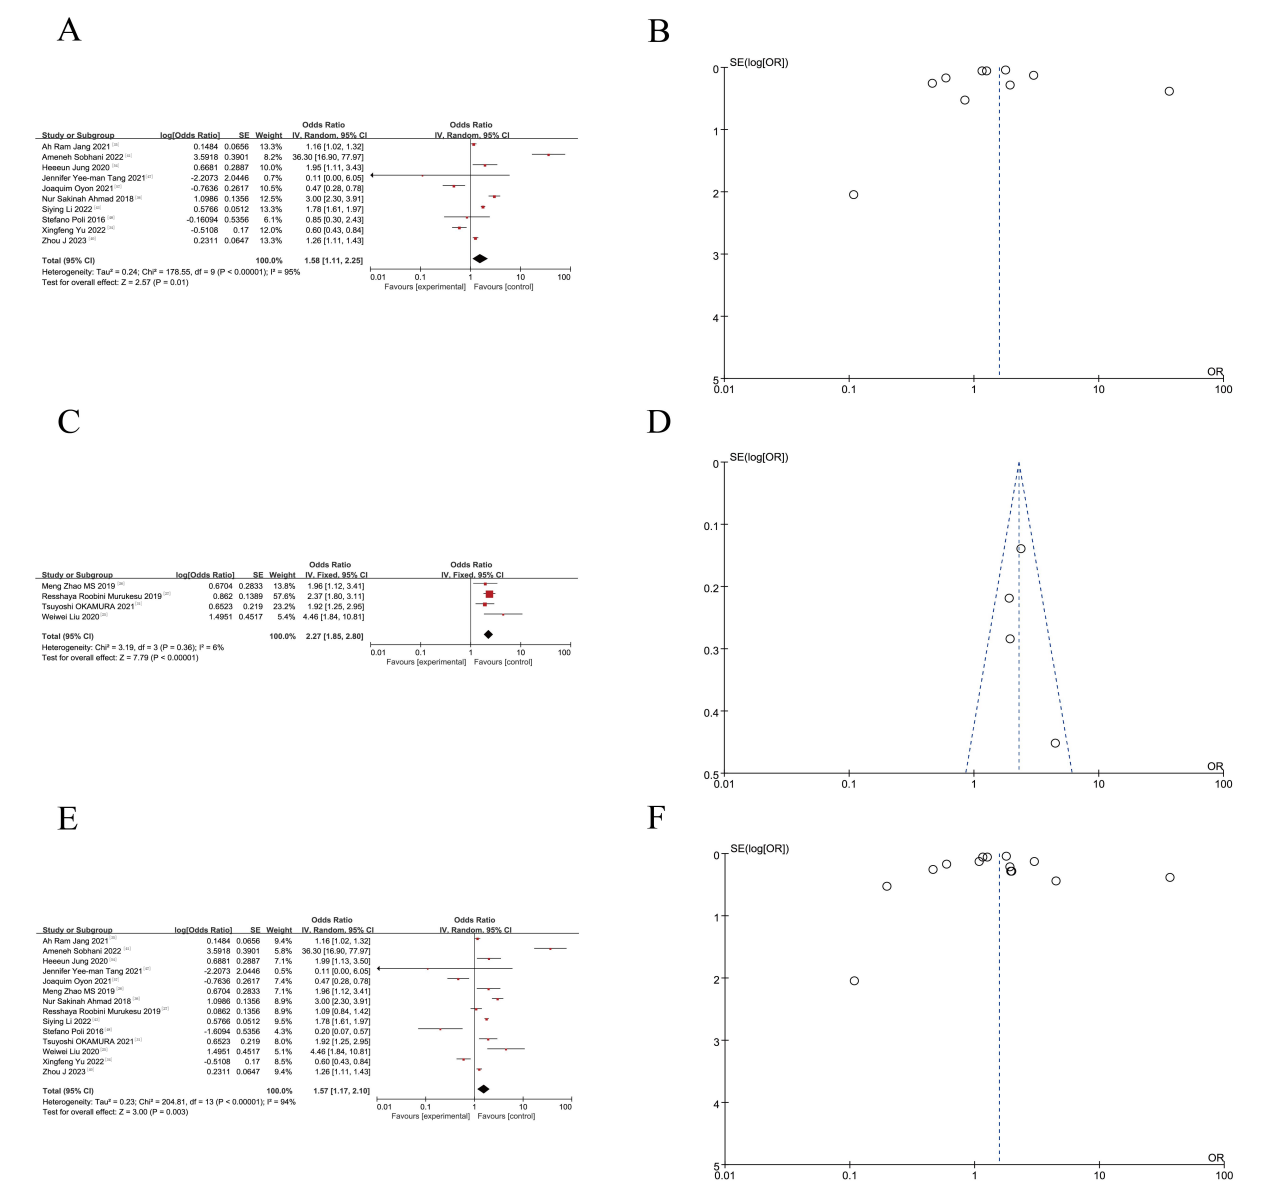

**Supplementary Figure S3.** Meta-analysis of behavior factors of frailty for [A,B] physical inactivity (community), [C,D] physical inactivity(nursing home), and [E,F] physical inactivity (community and nursing home). Forest plot is represented by mean with 95% confidence interval.



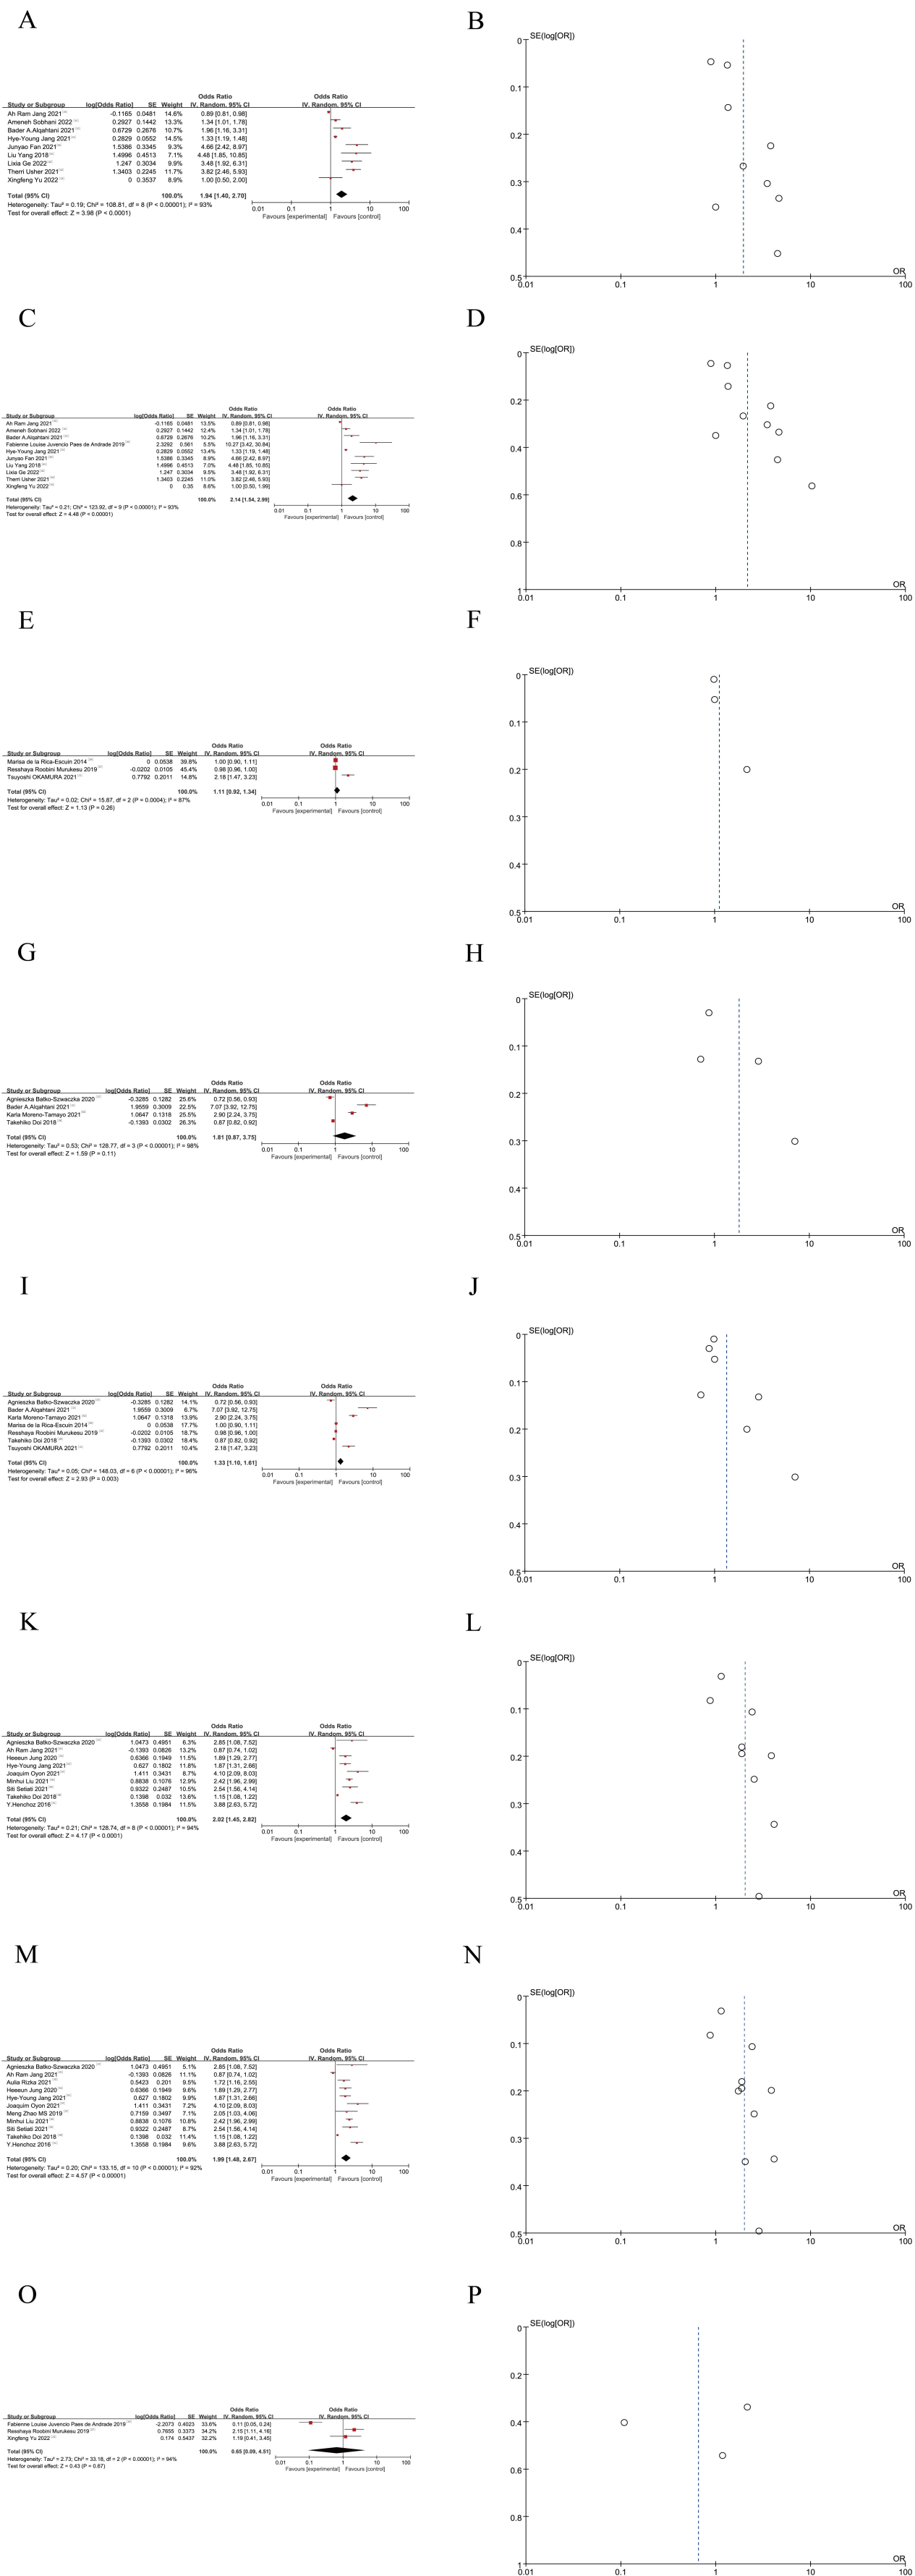

**Supplementary Figure S4.** Meta-analysis of disease factors of frailty for [A,B] chronic conditions (community), [C,D] chronic conditions (community and nursing home), [E,F] cognitive impairment (nursing home), [G,H] cognitive

impairment (community), [I,J] cognitive impairment (community and nursing home), [K,L] depression (community),[M,N] depression (community and nursing home), [O,P] hypertension (community and nursing home). Forest plot is represented by mean with 95% confidence interval.
