# Supplementary material for: Factors Associated with Frailty in Older Adults in Community and Nursing Home Settings: A Systematic Review with a Meta-Analysis
Source: MDPI journal article supplement (doi:10.3390/jcm13082382), 2024-04-19
Supplement: s1 [file s1]

**Table S1.** Characteristics of studies included in this meta-analysis

| First author(year)                              | Setting   | Region            | Study design    | Total (N) | Male (N) | Female (N) | Mean age  | Age | Measure                | Prevalence (N%) |
|-------------------------------------------------|-----------|-------------------|-----------------|-----------|----------|------------|-----------|-----|------------------------|-----------------|
| Weiwei Liu(2020)                                | NH        | China             | cross-sectional | 2630      | 889      | 1741       | 80.8±8.9  | ≥60 | PFP                    | 55.6            |
| Meng Zhao MS(2019)                              | NH        | China             | cross-sectional | 370       | 150      | 220        | 77.6±8.7  | ≥60 | PFP                    | 29.2            |
| Resshaya Roobini Murukesu (2019)                | NH        | Malaysia          | cross-sectional | 302       | 208      | 94         | 68.9±7.2  | ≥60 | PFP                    | 40.7            |
| Mariana Marinho Davino de Medeiros (2020)       | NH        | Brazil            | cross-sectional | 344       | 138      | 206        | 77.7±9.1  | ≥60 | PFP                    | 58.1            |
| <u>Marisa de la Rica-Escuín (2014)</u>          | NH        | Spain             | Cohort study    | 287       | 100      | 187        | 84.2±6.8  | ≥65 | PFP                    | 69.3            |
| Fabienne Louise Juvêncio Paes de Andrade (2019) | NH        | Brazil            | cross-sectional | 321       | 242      | 79         | NA        | ≥60 | PFP                    | 80.1            |
| Tsuyoshi OKAMURA (2021)                         | NH        | Japan             | Cohort study    | 1736      | NA       | NA         | NA        | ≥65 | KCL                    | 10.0-16.0       |
| Aulia Rizka (2021)                              | NH        | Indonesia         | cross-sectional | 214       | 143      | 71         | 68.0±4.3  | ≥60 | PFP                    | 46.5            |
| Bader A. Alqahtani (2021)                       | Community | Saudi Arabia      | cross-sectional | 486       | 317      | 169        | NA        | ≥60 | PFP                    | 21.4            |
| Xingfeng Yu (2022)                              | Community | China             | cross-sectional | 2647      | 1087     | 1560       | 68.6±6.1  | ≥60 | CFAI                   | 70.6            |
| Ah Ram Jang (2021)                              | Community | Korea             | Cohort study    | 1428      | 689      | 739        | 77.9±3.8  | ≥70 | FRAIL scale            | 14.1            |
| Nur Sakinah Ahmad (2018)                        | Community | Malaysia          | Cohort study    | 2413      | 887      | 1437       | NA        | ≥60 | PFP                    | 9.2-9.8         |
| Agnieszka Batko-Szwaczka (2020)                 | Community | Poland            | cross-sectional | 160       | 89       | 71         | 68.0±4.2  | ≥60 | PFP                    | 2.5             |
| <u>Takehiko Doi (2018)</u>                      | Community | Japan             | Cohort Study    | 4676      | 2316     | 2360       | NA        | ≥65 | PFP                    | 7.6             |
| Graziamaria corbi (2019)                        | Community | Italy             | Cohort Study    | 1284      | 552      | 732        | 74.2±6.4  | ≥65 | FSS                    | 16.3            |
| Zhou J (2023)                                   | Community | China             | Cohort Study    | 7471      | 3310     | 4161       | 89.4±6.6  | ≥80 | FI                     | 34.0            |
| Ameneh Sobhani (2022)                           | Community | Iran              | cross-sectional | 1529      | 740      | 789        | 70.6±8.2  | ≥60 | PFP                    | 9.55            |
| Lixia Ge (2022)                                 | Community | Singapore         | Cohort Study    | 606       | 257      | 349        | NA        | ≥60 | Clinical Frailty Scale | 10.7            |
| Siyang Li (2022)                                | Community | China             | Cohort Study    | 14314     | 6300     | 8014       | NA        | ≥60 | FI                     | 27.2            |
| Therri Usher (2021)                             | Community | The United States | Cohort Study    | 8245      | 3200     | 5045       | 74.7±0.3  | ≥65 | PFP                    | 81.3            |
| Marcos Kaic Lopes Alves (2020)                  | Community | Brazil            | cross-sectional | 580       | 185      | 395        | NA        | ≥60 | PFP                    | 13.1            |
| L.L. Peters (2015)                              | Community | Netherlands       | Cohort Study    | 12,706    | 2667     | 3045       | NA        | ≥60 | GFI                    | 9.0             |
| Jennifer Yee-man Tang (2021)                    | Community | China             | cross-sectional | 345       | NA       | NA         | NA        | ≥60 | FRAIL scale            | 41.0            |
| Stefano Poli (2016)                             | Community | Italy             | cross-sectional | 542       | 259      | 283        | 79.6±5.1  | ≥65 | FRAIL scale            | 15.1            |
| O.H. DEL BRUTTO (2020)                          | Community | Ecuadorian        | cross-sectional | 324       | 138      | 186        | 70.5±8.0  | ≥60 | EFS                    | 21.0            |
| <u>Junyao Fan (2021)</u>                        | Community | China             | cross-sectional | 454       | 192      | 262        | 69.3±6.7  | ≥60 | TFI                    | 40.7            |
| Y. HENCHOZ (2016)                               | Community | Switzerland       | Cohort Study    | 927       | 368      | 559        | NA        | ≥65 | PFP                    | 3.3             |
| Takaaki Ikeda (2019)                            | Community | Japan             | Cohort Study    | 64496     | 19 092   | 19 605     | NA        | ≥65 | KCL                    | 24.7            |
| Hye-Young Jang (2021)                           | Community | Korea             | cross-sectional | 2340      | 455      | 1885       | 75.7±6.7  | ≥65 | FRAIL scale            | 10.8            |
| Heeun Jung (2020)                               | Community | Korea             | Cohort Study    | 2907      | 1383     | 1524       | NA        | ≥70 | PFP                    | 45.2            |
| Yu Kume (2021)                                  | Community | Japan             | Cohort Study    | 313       | 98       | 215        | 73.7±5.4  | ≥65 | FI                     | 3.8             |
| Minhui Liu (2021)                               | Community | The United States | Cohort Study    | 7609      | 3171     | 4438       | NA        | ≥65 | PFP                    | 14.0            |
| Joaquim Oyon (2021)                             | Community | Spain             | cross-sectional | 338       | 61       | 277        | 77.2±5.0  | ≥70 | PFP                    | 36.1            |
| Gulsah Ozsoy (2021)                             | Community | Turkey            | cross-sectional | 166       | 54       | 112        | 72.9±6.4  | ≥60 | TFI, PFP               | 60.0-72.5       |
| Siti Setiati (2021)                             | Community | Indonesia         | Cohort Study    | 908       | 438      | 470        | NA        | ≥60 | FRAIL scale            | 18.4            |
| Huai-yu Wang (2021)                             | Community | China             | Cohort Study    | 3327      | 1684     | 1643       | 81.2±10.3 | ≥60 | PFP                    | 26.8            |
| Liu Yang (2018)                                 | Community | China             | cross-sectional | 306       | 169      | 137        | NA        | ≥60 | EFS                    | 14.1            |
| Karla Moreno-Tamayo (2021)                      | Community | Mexico            | cross-sectional | 591       | NA       | NA         | 76.3±3.3  | ≥70 | PFP                    | 10.7            |

Abbreviations: PFP, physical Fried's phenotype; KCL, Kihon Checklist; FSS, Frailty Staging System; FI, frailty index; DAI, Deficit Accumulation Index; GFI, Groningen Frailty indicator; EFS, Edmonton Frailty Scale; TFI, Tilburg Frailty Indicator; NH, nursing home; CFAI, Comprehensive Frailty Assessment Instrument.

**Table S2.** The estimated total uses and features of frailty instruments in the literature

| <b>Instrument</b>      | <b>Nature</b>    | <b>Features</b>                                                                                                                                                                                                  | <b>Settings</b> | <b>No. of studies</b> |
|------------------------|------------------|------------------------------------------------------------------------------------------------------------------------------------------------------------------------------------------------------------------|-----------------|-----------------------|
| PFP                    | uni-dimensional  | unintentional weight loss, self-reported exhaustion,                                                                                                                                                             | NH              | 7                     |
|                        |                  | muscle weakness, slow walking speed and low physical activity                                                                                                                                                    | Community       | 13                    |
| FRAIL scale            | uni-dimensional  | fatigue, resistance, ambulation, illnesses, loss of weight                                                                                                                                                       | Community       | 5                     |
| Clinical frailty scale | multidimensional | physical health, functional independence, social interaction, mental health, medical treatment                                                                                                                   | Community       | 1                     |
| KCL                    | multidimensional | physiological function, cognitive function, psychological well-being, social activities                                                                                                                          | NH              | 1                     |
|                        |                  |                                                                                                                                                                                                                  | Community       | 1                     |
| FSS                    | multidimensional | disability, mobility, cognitive function, visual function, hearing function, urinary continence and social support                                                                                               | Community       | 1                     |
| FI/DAI                 | multidimensional | symptoms, illnesses, physical, and cognitive impairments, disabilities, psychosocial risk factors, and laboratory abnormalities                                                                                  | Community       | 4                     |
| GFI                    | multidimensional | physiological function, cognitive function, psychological well-being, social activities, activities of daily living (ADLs), physical activity level                                                              | Community       | 1                     |
| EFS                    | multidimensional | cognitive function, general health status, functional independence, social support, medication use, nutritional status, mood                                                                                     | Community       | 2                     |
| TFI                    | multidimensional | Part A comprises 10 questions on frailty determinants (e.g., age, gender, marital status, education level, and way of life); Part B comprises 15 frailty elements arranged according to three different aspects. | Community       | 2                     |
| CFAI                   | multidimensional | physical, psychological, social and environmental                                                                                                                                                                | Community       | 1                     |

Abbreviations: PFP, physical Fried's phenotype; KCL, Kihon Checklist; FSS, Frailty Staging System; FI, frailty index; DAI, Deficit Accumulation Index; GFI, Groningen Frailty indicator; EFS, Edmonton Frailty Scale; TFI, Tilburg Frailty Indicator; NH, nursing home; CFAI, Comprehensive Frailty Assessment Instrument.

Note: In cases where the same article utilizes different tools, a duplicate calculation is performed to address this scenario.
