# Supplementary material for: Factors Associated with Frailty in Older Adults in Community and Nursing Home Settings: A Systematic Review with a Meta-Analysis
Source: MDPI journal article supplement (doi:10.3390/jcm13082382), 2024-04-19
Supplement: s1 [file s1]

Figure S5 Risk of bias graph of the included cross-sectional studies

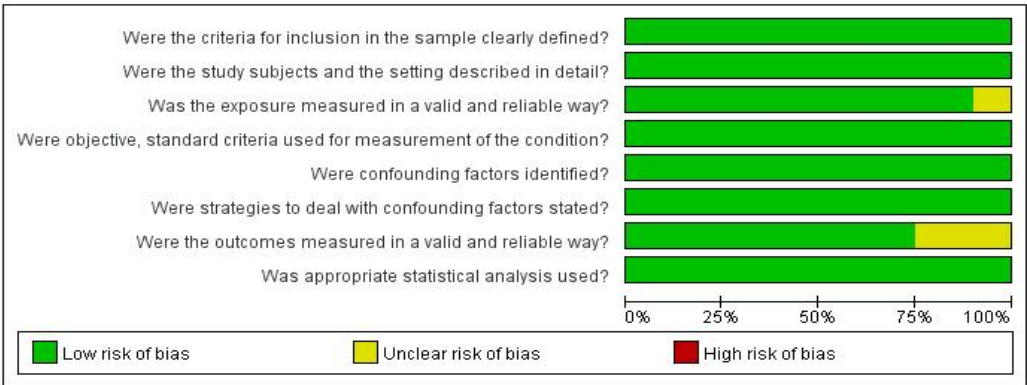

Figure S6 Risk of bias summary of the included cross-sectional studies

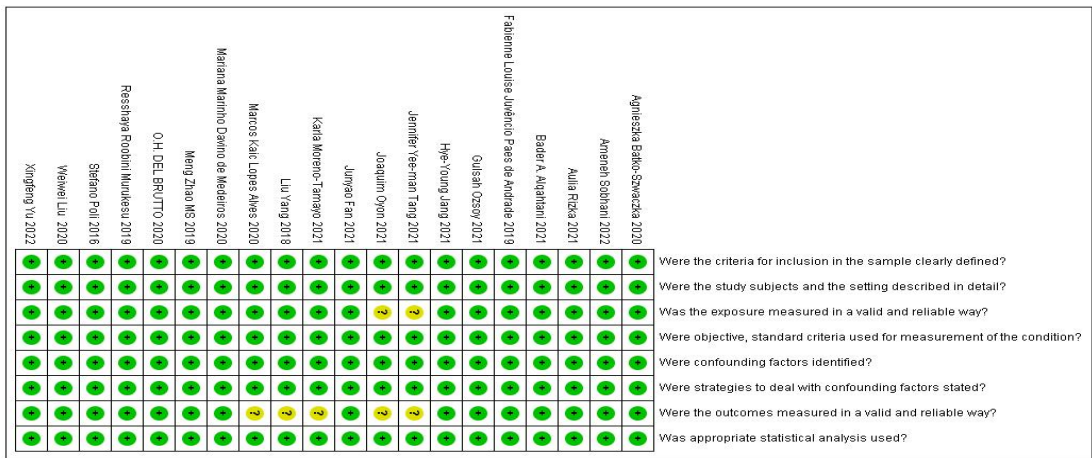

Figure S7 Risk of bias graph of the included cohort studies

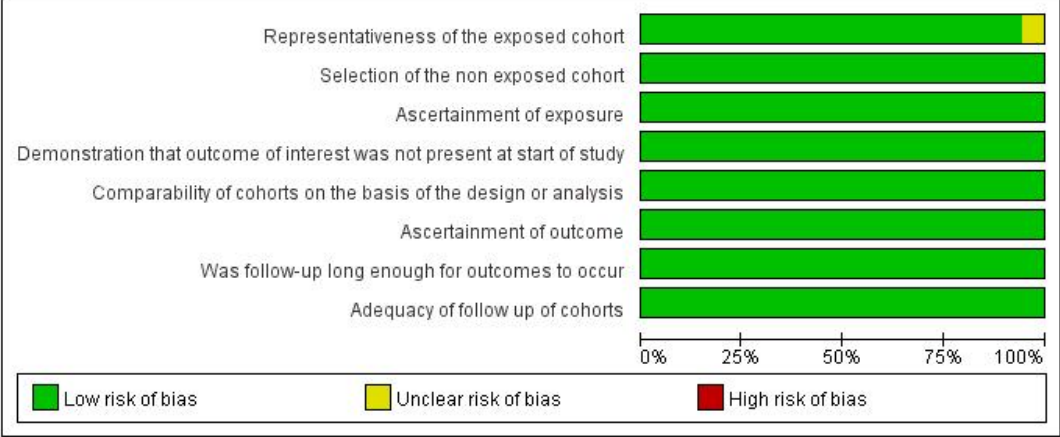

Figure S8 Risk of bias summary of the included cohort studies

|                               |   |   |                                                                          |
|-------------------------------|---|---|--------------------------------------------------------------------------|
| Ah Ram Jang 2021              | + | + | Representativeness of the exposed cohort                                 |
| Gratzmaria 2021               | 2 | + | Selection of the non exposed cohort                                      |
| Heeun Jung 2020               | + | + | Ascertainment of exposure                                                |
| Hua-yu Wang 2021              | + | + | Demonstration that outcome of interest was not present at start of study |
| L.L. Peters 2016              | + | + | Comparability of cohorts on the basis of the design or analysis          |
| Lilia Ge 2022                 | + | + | Ascertainment of outcome                                                 |
| Marisa de la Riva-Escuin 2014 | + | + | Was follow-up long enough for outcomes to occur                          |
| Mithul Liu 2021               | + | + | Adequacy of follow up of cohorts                                         |
| Nur Sakinah Ahmad 2018        | + | + |                                                                          |
| Siti Setiati 2021             | + | + |                                                                          |
| Syng Li 2022                  | + | + |                                                                          |
| Takaaki Ikeda 2019            | + | + |                                                                          |
| Takenko Doi 2018              | + | + |                                                                          |
| Therri Usher 2021             | + | + |                                                                          |
| Tsuyoshi Okamura 2021         | + | + |                                                                          |
| Y. HENCHOZ 2016               | + | + |                                                                          |
| Yu Kume 2021                  | + | + |                                                                          |
| Zhou J 2023                   | + | + |                                                                          |
