# Supplementary material for: Factors Associated with Frailty in Older Adults in Community and Nursing Home Settings: A Systematic Review with a Meta-Analysis
Source: J Clin Med. 2024 Apr 19;13(8):2382. doi: 10.3390/jcm13082382 (PMC11050860; doi:10.3390/jcm13082382)
Supplement: Supplementary file 1 [file jcm-13-02382-s001.zip]

Archive with 4 entries (4 files):
- Supplemental File S1 search strategy for each database.pdf
- Supplemental File S2 Tables.pdf
- Supplemental File S3 quailty assessment.pdf
- Supplemental File S4 forest plots and bias assessment.pdf
